# Supplementary material
Source: publisher figshare collection journal article supplement (https://acs.figshare.com/ndownloader/files/5197366)
Supplement: Supplementary file 1 [file 5197366]

  
data_struc 
  
_audit_creation_method            SHELXL-97 
_chemical_name_systematic 
; 
 ? 
; 
_chemical_name_common             ? 
_chemical_melting_point           ? 
_chemical_formula_moiety          ? 
_chemical_formula_sum 
 'C38 H48.20 Mn2 N4 O8.10' 
_chemical_formula_weight          800.49 
  
loop_ 
 _atom_type_symbol 
 _atom_type_description 
 _atom_type_scat_dispersion_real 
 _atom_type_scat_dispersion_imag 
 _atom_type_scat_source 
 'C'  'C'   0.0033   0.0016 
 'International Tables Vol C Tables 4.2.6.8 and 6.1.1.4' 
 'H'  'H'   0.0000   0.0000 
 'International Tables Vol C Tables 4.2.6.8 and 6.1.1.4' 
 'N'  'N'   0.0061   0.0033 
 'International Tables Vol C Tables 4.2.6.8 and 6.1.1.4' 
 'O'  'O'   0.0106   0.0060 
 'International Tables Vol C Tables 4.2.6.8 and 6.1.1.4' 
 'Mn'  'Mn'   0.3368   0.7283 
 'International Tables Vol C Tables 4.2.6.8 and 6.1.1.4' 
  
_symmetry_cell_setting            Monoclinic 
_symmetry_space_group_name_H-M    P2(1)/c 
  
loop_ 
 _symmetry_equiv_pos_as_xyz 
 'x, y, z' 
 '-x, y+1/2, -z+1/2' 
 '-x, -y, -z' 
 'x, -y-1/2, z-1/2' 
  
_cell_length_a                    13.0351(8) 
_cell_length_b                    15.9046(9) 
_cell_length_c                    20.3881(12) 
_cell_angle_alpha                 90.00 
_cell_angle_beta                  104.2170(10) 
_cell_angle_gamma                 90.00 
_cell_volume                      4097.4(4) 
_cell_formula_units_Z             4 
_cell_measurement_temperature     223(2) 
_cell_measurement_reflns_used     ? 
_cell_measurement_theta_min       ? 
_cell_measurement_theta_max       ? 
  
_exptl_crystal_description        ? 
_exptl_crystal_colour             ? 
_exptl_crystal_size_max           0.15 
_exptl_crystal_size_mid           0.15 
_exptl_crystal_size_min           0.4 
_exptl_crystal_density_meas       ? 
_exptl_crystal_density_diffrn     1.298 
_exptl_crystal_density_method     'not measured' 
_exptl_crystal_F_000              1676 
_exptl_absorpt_coefficient_mu     0.669 
_exptl_absorpt_correction_type    none 
_exptl_absorpt_correction_T_min   ? 
_exptl_absorpt_correction_T_max   ? 
_exptl_absorpt_process_details    ? 
  
_exptl_special_details 
; 
 ? 
; 
  
_diffrn_ambient_temperature       223(2) 
_diffrn_radiation_wavelength      0.71073 
_diffrn_radiation_type            MoK\a 
_diffrn_radiation_source          'fine-focus sealed tube' 
_diffrn_radiation_monochromator   graphite 
_diffrn_measurement_device_type   'CCD area detector' 
_diffrn_measurement_method        'phi and omega scans' 
_diffrn_detector_area_resol_mean  ? 
_diffrn_standards_number          ? 
_diffrn_standards_interval_count  ? 
_diffrn_standards_interval_time   ? 
_diffrn_standards_decay_%         ? 
_diffrn_reflns_number             23754 
_diffrn_reflns_av_R_equivalents   0.0437 
_diffrn_reflns_av_sigmaI/netI     0.0990 
_diffrn_reflns_limit_h_min        -17 
_diffrn_reflns_limit_h_max        17 
_diffrn_reflns_limit_k_min        -21 
_diffrn_reflns_limit_k_max        20 
_diffrn_reflns_limit_l_min        -10 
_diffrn_reflns_limit_l_max        27 
_diffrn_reflns_theta_min          2.06 
_diffrn_reflns_theta_max          28.90 
_reflns_number_total              9745 
_reflns_number_gt                 4994 
_reflns_threshold_expression      >2sigma(I) 
  
_computing_data_collection        'Bruker SMART' 
_computing_cell_refinement        'Bruker SMART' 
_computing_data_reduction         'Bruker SHELXTL' 
_computing_structure_solution     'SHELXS-97 (Sheldrick, 1990)' 
_computing_structure_refinement   'SHELXL-97 (Sheldrick, 1997)' 
_computing_molecular_graphics     'Bruker SHELXTL' 
_computing_publication_material   'Bruker SHELXTL' 
  
_refine_special_details 
; 
 Refinement of F^2^ against ALL reflections.  The weighted R-factor wR and 
 goodness of fit S are based on F^2^, conventional R-factors R are based 
 on F, with F set to zero for negative F^2^. The threshold expression of 
 F^2^ > 2sigma(F^2^) is used only for calculating R-factors(gt) etc. and is 
 not relevant to the choice of reflections for refinement.  R-factors based 
 on F^2^ are statistically about twice as large as those based on F, and R- 
 factors based on ALL data will be even larger. 
; 
  
_refine_ls_structure_factor_coef  Fsqd 
_refine_ls_matrix_type            full 
_refine_ls_weighting_scheme       calc 
_refine_ls_weighting_details 
 'calc w=1/[\s^2^(Fo^2^)+(0.0237P)^2^+0.0000P] where P=(Fo^2^+2Fc^2^)/3' 
_atom_sites_solution_primary      direct 
_atom_sites_solution_secondary    difmap 
_atom_sites_solution_hydrogens    geom 
_refine_ls_hydrogen_treatment     mixed 
_refine_ls_extinction_method      none 
_refine_ls_extinction_coef        ? 
_refine_ls_number_reflns          9745 
_refine_ls_number_parameters      670 
_refine_ls_number_restraints      0 
_refine_ls_R_factor_all           0.0994 
_refine_ls_R_factor_gt            0.0340 
_refine_ls_wR_factor_ref          0.0636 
_refine_ls_wR_factor_gt           0.0556 
_refine_ls_goodness_of_fit_ref    0.822 
_refine_ls_restrained_S_all       0.822 
_refine_ls_shift/su_max           0.136 
_refine_ls_shift/su_mean          0.005 
  
loop_ 
 _atom_site_label 
 _atom_site_type_symbol 
 _atom_site_fract_x 
 _atom_site_fract_y 
 _atom_site_fract_z 
 _atom_site_U_iso_or_equiv 
 _atom_site_adp_type 
 _atom_site_occupancy 
 _atom_site_symmetry_multiplicity 
 _atom_site_calc_flag 
 _atom_site_refinement_flags 
 _atom_site_disorder_assembly 
 _atom_site_disorder_group 
Mn1 Mn 0.05370(2) 0.728973(18) 0.408881(14) 0.03186(9) Uani 1 1 d . . . 
Mn2 Mn 0.46915(2) 0.662813(18) 0.674238(14) 0.03277(9) Uani 1 1 d . . . 
O21 O -0.00510(10) 0.63769(8) 0.46866(7) 0.0433(4) Uani 1 1 d . . . 
O22 O -0.01449(11) 0.81719(8) 0.46418(7) 0.0487(4) Uani 1 1 d . . . 
O31 O 0.10958(10) 0.82281(8) 0.35170(7) 0.0450(4) Uani 1 1 d . . . 
O32 O -0.06972(10) 0.71245(9) 0.32030(6) 0.0440(4) Uani 1 1 d . . . 
O41 O 0.52328(10) 0.63323(9) 0.58514(7) 0.0455(4) Uani 1 1 d . . . 
O42 O 0.51288(11) 0.78812(8) 0.65518(7) 0.0491(4) Uani 1 1 d . . . 
O51 O 0.61510(10) 0.63594(8) 0.74370(6) 0.0428(4) Uani 1 1 d . . . 
O52 O 0.41548(10) 0.68454(8) 0.76363(6) 0.0428(4) Uani 1 1 d . . . 
N1 N 0.28952(11) 0.66916(10) 0.61963(7) 0.0291(4) Uani 1 1 d . . . 
N2 N 0.22619(11) 0.72264(9) 0.47652(7) 0.0281(4) Uani 1 1 d . . . 
N3 N 0.40110(12) 0.52902(9) 0.66874(7) 0.0325(4) Uani 1 1 d . . . 
N4 N 0.14124(12) 0.62091(9) 0.37048(7) 0.0311(4) Uani 1 1 d . . . 
C1 C 0.23233(16) 0.74682(12) 0.59506(9) 0.0336(5) Uani 1 1 d . . . 
H1 H 0.1550(12) 0.7342(9) 0.5804(7) 0.020(4) Uiso 1 1 d . . . 
C2 C 0.27162(16) 0.77795(12) 0.53435(9) 0.0330(5) Uani 1 1 d . . . 
H2 H 0.3486(13) 0.7724(9) 0.5466(8) 0.025(5) Uiso 1 1 d . . . 
C3 C 0.2410(2) 0.86903(14) 0.51493(12) 0.0481(6) Uani 1 1 d . . . 
H3A H 0.1709(14) 0.8686(11) 0.4989(9) 0.034(6) Uiso 1 1 d . . . 
H3B H 0.2783(15) 0.8857(11) 0.4795(10) 0.052(7) Uiso 1 1 d . . . 
C4 C 0.2705(3) 0.92628(16) 0.57615(14) 0.0689(9) Uani 1 1 d . . . 
H4A H 0.345(2) 0.9297(15) 0.5948(14) 0.100(11) Uiso 1 1 d . . . 
H4B H 0.2490(16) 0.9832(14) 0.5594(11) 0.076(8) Uiso 1 1 d . . . 
C5 C 0.2163(3) 0.89769(17) 0.62985(15) 0.0735(9) Uani 1 1 d . . . 
H5A H 0.2345(16) 0.9307(13) 0.6687(12) 0.073(8) Uiso 1 1 d . . . 
H5B H 0.1400(18) 0.8981(13) 0.6115(12) 0.073(9) Uiso 1 1 d . . . 
C6 C 0.2526(2) 0.80939(15) 0.65365(12) 0.0502(7) Uani 1 1 d . . . 
H6A H 0.2197(15) 0.7889(12) 0.6872(11) 0.056(7) Uiso 1 1 d . . . 
H6B H 0.3276(15) 0.8112(11) 0.6756(9) 0.041(6) Uiso 1 1 d . . . 
C7 C 0.24170(17) 0.59971(13) 0.61360(10) 0.0327(5) Uani 1 1 d . . . 
H7 H 0.1735(13) 0.5951(10) 0.5944(8) 0.024(5) Uiso 1 1 d . . . 
C8 C 0.29666(15) 0.52155(12) 0.64008(9) 0.0310(5) Uani 1 1 d . . . 
C9 C 0.2442(2) 0.44559(14) 0.63762(11) 0.0447(6) Uani 1 1 d . . . 
H9 H 0.1757(14) 0.4428(11) 0.6200(9) 0.045(7) Uiso 1 1 d . . . 
C10 C 0.2999(2) 0.37491(16) 0.66435(12) 0.0538(7) Uani 1 1 d . . . 
H10 H 0.2662(15) 0.3246(13) 0.6646(10) 0.056(7) Uiso 1 1 d . . . 
C11 C 0.4055(2) 0.38231(15) 0.69368(12) 0.0520(6) Uani 1 1 d . . . 
H11 H 0.4469(14) 0.3353(12) 0.7131(9) 0.047(6) Uiso 1 1 d . . . 
C12 C 0.45301(19) 0.45988(14) 0.69500(11) 0.0434(6) Uani 1 1 d . . . 
H12 H 0.5271(15) 0.4679(11) 0.7162(9) 0.046(6) Uiso 1 1 d . . . 
C13 C 0.28308(16) 0.66478(12) 0.46142(10) 0.0312(5) Uani 1 1 d . . . 
H13 H 0.3527(13) 0.6566(9) 0.4856(8) 0.027(5) Uiso 1 1 d . . . 
C14 C 0.24204(14) 0.60770(11) 0.40466(9) 0.0292(5) Uani 1 1 d . . . 
C15 C 0.30314(18) 0.54391(13) 0.38721(11) 0.0427(6) Uani 1 1 d . . . 
H15 H 0.3740(14) 0.5376(10) 0.4136(9) 0.040(6) Uiso 1 1 d . . . 
C16 C 0.2592(2) 0.49271(15) 0.33281(13) 0.0504(6) Uani 1 1 d . . . 
H16 H 0.2988(15) 0.4520(12) 0.3217(10) 0.057(7) Uiso 1 1 d . . . 
C17 C 0.1576(2) 0.50655(14) 0.29782(12) 0.0478(6) Uani 1 1 d . . . 
H17 H 0.1252(13) 0.4735(10) 0.2612(9) 0.032(5) Uiso 1 1 d . . . 
C18 C 0.10064(19) 0.57064(13) 0.31760(11) 0.0408(5) Uani 1 1 d . . . 
H18 H 0.0279(13) 0.5822(10) 0.2954(8) 0.032(5) Uiso 1 1 d . . . 
C21 C -0.0889(3) 0.5706(2) 0.54463(18) 0.0631(8) Uani 1 1 d . . . 
H21A H -0.028(3) 0.531(2) 0.5598(16) 0.163(15) Uiso 1 1 d . . . 
H21B H -0.140(2) 0.5437(19) 0.5155(15) 0.130(15) Uiso 1 1 d . . . 
H21C H -0.129(2) 0.5802(19) 0.5742(16) 0.133(13) Uiso 1 1 d . . . 
C22 C -0.05953(15) 0.64897(15) 0.51142(10) 0.0415(5) Uani 1 1 d . . . 
C23 C -0.09146(18) 0.72677(17) 0.53047(11) 0.0514(6) Uani 1 1 d . . . 
H23 H -0.1315(15) 0.7241(12) 0.5614(10) 0.058(7) Uiso 1 1 d . . . 
C24 C -0.06815(16) 0.80509(15) 0.50734(11) 0.0465(6) Uani 1 1 d . . . 
C25 C -0.1061(4) 0.8836(2) 0.53599(19) 0.0797(10) Uani 1 1 d . . . 
H25A H -0.086(2) 0.9313(16) 0.5177(14) 0.100(12) Uiso 1 1 d . . . 
H25B H -0.091(2) 0.8831(18) 0.5842(17) 0.131(13) Uiso 1 1 d . . . 
H25C H -0.174(3) 0.881(2) 0.5328(17) 0.137(16) Uiso 1 1 d . . . 
C31 C 0.1409(3) 0.9051(3) 0.2625(2) 0.0797(10) Uani 1 1 d . . . 
H31A H 0.153(2) 0.9532(18) 0.2923(14) 0.117(14) Uiso 1 1 d . . . 
H31B H 0.1009(19) 0.9263(15) 0.2184(14) 0.097(9) Uiso 1 1 d . . . 
H31C H 0.203(2) 0.8783(15) 0.2593(13) 0.094(11) Uiso 1 1 d . . . 
C35 C -0.1719(3) 0.7126(4) 0.20801(16) 0.0875(12) Uani 1 1 d . . . 
H35A H -0.176(3) 0.652(2) 0.210(2) 0.19(2) Uiso 1 1 d . . . 
H35B H -0.166(2) 0.7293(18) 0.1684(15) 0.113(12) Uiso 1 1 d . . . 
H35C H -0.231(2) 0.732(2) 0.2148(15) 0.130(15) Uiso 1 1 d . . . 
C32 C 0.07805(17) 0.83883(14) 0.28959(12) 0.0487(6) Uani 1 1 d . . . 
C34 C -0.07738(17) 0.74271(15) 0.26197(11) 0.0494(6) Uani 1 1 d . . . 
C33 C -0.0086(2) 0.80101(17) 0.24542(12) 0.0566(7) Uani 1 1 d . . . 
H33 H -0.0223(15) 0.8169(12) 0.2013(11) 0.057(7) Uiso 1 1 d . . . 
C41 C 0.6056(3) 0.6394(3) 0.49426(17) 0.0749(10) Uani 1 1 d . . . 
H41A H 0.556(3) 0.635(2) 0.4595(18) 0.148(17) Uiso 1 1 d . . . 
H41B H 0.614(3) 0.582(2) 0.501(2) 0.19(2) Uiso 1 1 d . . . 
H41C H 0.653(2) 0.6673(18) 0.4794(15) 0.118(13) Uiso 1 1 d . . . 
C42 C 0.57042(15) 0.68047(18) 0.55173(10) 0.0473(6) Uani 1 1 d . . . 
C43 C 0.59030(18) 0.76588(19) 0.56337(13) 0.0561(7) Uani 1 1 d . . . 
H43 H 0.6253(15) 0.7932(12) 0.5373(10) 0.051(7) Uiso 1 1 d . . . 
C44 C 0.56223(17) 0.81447(15) 0.61268(13) 0.0512(6) Uani 1 1 d . . . 
C45 C 0.5933(4) 0.9072(2) 0.6187(3) 0.0847(11) Uani 1 1 d . . . 
H45A H 0.553(3) 0.938(2) 0.6416(17) 0.133(16) Uiso 1 1 d . . . 
H45B H 0.555(3) 0.935(3) 0.585(2) 0.19(2) Uiso 1 1 d . . . 
H45C H 0.647(3) 0.914(2) 0.6015(18) 0.135(16) Uiso 1 1 d . . . 
C51 C 0.75624(19) 0.62982(19) 0.84098(15) 0.0452(6) Uani 1 1 d . . . 
H51A H 0.7824(19) 0.5813(16) 0.8331(13) 0.094(11) Uiso 1 1 d . . . 
H51B H 0.7713(19) 0.6252(16) 0.8875(14) 0.099(10) Uiso 1 1 d . . . 
H51C H 0.791(2) 0.6656(17) 0.8220(14) 0.108(12) Uiso 1 1 d . . . 
C52 C 0.64124(15) 0.64047(11) 0.80791(10) 0.0308(5) Uani 1 1 d . . . 
C53 C 0.57094(17) 0.65607(13) 0.84772(11) 0.0400(5) Uani 1 1 d . . . 
H53 H 0.6046(14) 0.6570(11) 0.8973(10) 0.048(6) Uiso 1 1 d . . . 
C54 C 0.46406(16) 0.67647(12) 0.82483(10) 0.0400(5) Uani 1 1 d . . . 
C55 C 0.4011(3) 0.6932(4) 0.87601(17) 0.0995(15) Uani 1 1 d . . . 
H55A H 0.349(3) 0.731(2) 0.8599(16) 0.137(15) Uiso 1 1 d . . . 
H55B H 0.439(2) 0.6962(16) 0.9181(14) 0.103(10) Uiso 1 1 d . . . 
H55C H 0.350(3) 0.663(2) 0.8698(17) 0.125(16) Uiso 1 1 d . . . 
O1 O 0.0033(14) 1.0314(12) 0.6169(10) 0.109(7) Uani 0.10 1 d P . . 
  
loop_ 
 _atom_site_aniso_label 
 _atom_site_aniso_U_11 
 _atom_site_aniso_U_22 
 _atom_site_aniso_U_33 
 _atom_site_aniso_U_23 
 _atom_site_aniso_U_13 
 _atom_site_aniso_U_12 
Mn1 0.03113(17) 0.04054(18) 0.02468(16) 0.00487(15) 0.00830(13) 0.00722(14) 
Mn2 0.03139(17) 0.04079(18) 0.02576(16) -0.00233(15) 0.00629(13) 0.00038(15) 
O21 0.0464(9) 0.0490(9) 0.0409(8) 0.0067(7) 0.0231(8) 0.0031(7) 
O22 0.0546(10) 0.0530(9) 0.0436(9) 0.0061(8) 0.0216(8) 0.0186(7) 
O31 0.0502(9) 0.0491(9) 0.0354(8) 0.0138(7) 0.0097(7) 0.0014(7) 
O32 0.0362(8) 0.0654(10) 0.0284(8) 0.0053(8) 0.0041(7) 0.0047(7) 
O41 0.0394(9) 0.0654(10) 0.0340(8) -0.0041(8) 0.0134(7) -0.0030(7) 
O42 0.0525(9) 0.0501(9) 0.0442(9) 0.0000(8) 0.0111(8) -0.0104(8) 
O51 0.0337(8) 0.0620(10) 0.0322(8) -0.0052(7) 0.0071(7) 0.0102(7) 
O52 0.0361(8) 0.0646(10) 0.0274(8) -0.0045(7) 0.0073(7) 0.0078(7) 
N1 0.0331(9) 0.0310(9) 0.0228(8) -0.0006(8) 0.0060(7) 0.0051(8) 
N2 0.0335(9) 0.0290(9) 0.0218(8) 0.0023(8) 0.0066(7) 0.0020(8) 
N3 0.0349(10) 0.0354(10) 0.0268(9) 0.0028(8) 0.0071(8) 0.0076(8) 
N4 0.0326(10) 0.0359(9) 0.0256(9) -0.0012(8) 0.0088(8) 0.0016(8) 
C1 0.0346(13) 0.0376(13) 0.0271(11) 0.0005(10) 0.0049(10) 0.0113(10) 
C2 0.0325(12) 0.0350(12) 0.0285(11) -0.0027(10) 0.0016(10) 0.0044(10) 
C3 0.0579(18) 0.0385(14) 0.0425(15) 0.0015(12) 0.0021(15) 0.0042(13) 
C4 0.116(3) 0.0301(15) 0.0484(18) -0.0037(13) -0.0035(19) 0.0136(16) 
C5 0.113(3) 0.0515(18) 0.0481(18) -0.0158(15) 0.0037(19) 0.0351(18) 
C6 0.0666(19) 0.0469(15) 0.0348(14) -0.0049(12) 0.0081(14) 0.0206(13) 
C7 0.0246(12) 0.0456(14) 0.0274(12) -0.0042(11) 0.0057(10) 0.0011(11) 
C8 0.0363(12) 0.0323(12) 0.0261(11) -0.0016(10) 0.0108(10) 0.0003(10) 
C9 0.0454(16) 0.0450(15) 0.0445(14) -0.0033(12) 0.0124(13) -0.0109(13) 
C10 0.079(2) 0.0353(15) 0.0511(16) 0.0024(13) 0.0239(15) -0.0094(15) 
C11 0.0739(19) 0.0371(15) 0.0471(15) 0.0117(13) 0.0185(14) 0.0163(15) 
C12 0.0467(15) 0.0429(15) 0.0405(14) 0.0037(12) 0.0106(12) 0.0101(12) 
C13 0.0266(12) 0.0374(12) 0.0298(11) 0.0027(10) 0.0075(10) 0.0025(11) 
C14 0.0285(11) 0.0330(11) 0.0290(11) 0.0024(10) 0.0124(10) 0.0005(9) 
C15 0.0350(14) 0.0462(14) 0.0503(15) -0.0061(12) 0.0171(12) 0.0054(11) 
C16 0.0585(17) 0.0426(15) 0.0596(17) -0.0127(13) 0.0326(15) 0.0039(13) 
C17 0.0603(17) 0.0469(15) 0.0401(14) -0.0157(12) 0.0201(13) -0.0085(13) 
C18 0.0408(14) 0.0477(14) 0.0344(13) -0.0064(12) 0.0101(12) -0.0011(12) 
C21 0.060(2) 0.078(2) 0.0598(19) 0.0182(17) 0.0311(18) -0.0089(18) 
C22 0.0305(12) 0.0655(16) 0.0281(12) 0.0090(12) 0.0063(10) 0.0007(11) 
C23 0.0490(15) 0.0746(19) 0.0383(14) 0.0037(14) 0.0255(12) 0.0101(14) 
C24 0.0409(14) 0.0669(17) 0.0321(12) 0.0012(12) 0.0099(11) 0.0237(12) 
C25 0.103(3) 0.082(3) 0.067(2) 0.007(2) 0.046(2) 0.045(2) 
C31 0.075(2) 0.098(3) 0.073(2) 0.047(2) 0.031(2) 0.007(2) 
C35 0.057(2) 0.167(4) 0.0303(16) -0.005(2) -0.0042(15) -0.012(2) 
C32 0.0463(14) 0.0593(15) 0.0458(15) 0.0234(13) 0.0214(13) 0.0179(12) 
C34 0.0389(14) 0.0779(18) 0.0308(13) 0.0015(13) 0.0073(11) 0.0174(12) 
C33 0.0507(16) 0.093(2) 0.0269(13) 0.0215(14) 0.0104(13) 0.0132(14) 
C41 0.055(2) 0.133(4) 0.0451(18) -0.003(2) 0.0285(17) 0.004(2) 
C42 0.0228(12) 0.092(2) 0.0248(12) 0.0048(13) 0.0016(10) 0.0050(12) 
C43 0.0448(15) 0.081(2) 0.0415(15) 0.0173(16) 0.0088(12) -0.0142(15) 
C44 0.0386(14) 0.0596(17) 0.0474(15) 0.0120(13) -0.0048(12) -0.0119(12) 
C45 0.079(3) 0.062(2) 0.115(3) 0.023(2) 0.028(3) -0.015(2) 
C51 0.0359(14) 0.0472(17) 0.0473(17) 0.0072(14) 0.0000(13) 0.0042(13) 
C52 0.0334(12) 0.0208(10) 0.0344(12) -0.0002(10) 0.0009(10) -0.0017(9) 
C53 0.0370(13) 0.0566(14) 0.0238(11) -0.0057(11) 0.0023(10) -0.0020(11) 
C54 0.0411(14) 0.0483(14) 0.0321(12) -0.0110(11) 0.0118(11) -0.0048(11) 
C55 0.051(2) 0.211(5) 0.0402(18) -0.035(2) 0.0172(17) 0.009(3) 
O1 0.086(14) 0.103(14) 0.130(18) 0.017(14) 0.012(13) 0.001(11) 
  
_geom_special_details 
; 
 All esds (except the esd in the dihedral angle between two l.s. planes) 
 are estimated using the full covariance matrix.  The cell esds are taken 
 into account individually in the estimation of esds in distances, angles 
 and torsion angles; correlations between esds in cell parameters are only 
 used when they are defined by crystal symmetry.  An approximate (isotropic) 
 treatment of cell esds is used for estimating esds involving l.s. planes. 
; 
  
loop_ 
 _geom_bond_atom_site_label_1 
 _geom_bond_atom_site_label_2 
 _geom_bond_distance 
 _geom_bond_site_symmetry_2 
 _geom_bond_publ_flag 
Mn1 O32 2.1194(13) . ? 
Mn1 O22 2.1266(14) . ? 
Mn1 O31 2.1294(13) . ? 
Mn1 O21 2.1539(13) . ? 
Mn1 N4 2.3039(15) . ? 
Mn1 N2 2.3333(14) . ? 
Mn2 O51 2.1176(13) . ? 
Mn2 O52 2.1346(13) . ? 
Mn2 O42 2.1346(14) . ? 
Mn2 O41 2.1560(14) . ? 
Mn2 N3 2.2975(15) . ? 
Mn2 N1 2.3349(15) . ? 
O21 C22 1.265(2) . ? 
O22 C24 1.266(2) . ? 
O31 C32 1.258(2) . ? 
O32 C34 1.264(2) . ? 
O41 C42 1.270(2) . ? 
O42 C44 1.271(2) . ? 
O51 C52 1.271(2) . ? 
O52 C54 1.259(2) . ? 
N1 C7 1.259(2) . ? 
N1 C1 1.466(2) . ? 
N2 C13 1.266(2) . ? 
N2 C2 1.474(2) . ? 
N3 C12 1.333(2) . ? 
N3 C8 1.348(2) . ? 
N4 C18 1.342(2) . ? 
N4 C14 1.344(2) . ? 
C1 C6 1.527(3) . ? 
C1 C2 1.533(3) . ? 
C2 C3 1.529(3) . ? 
C3 C4 1.516(3) . ? 
C4 C5 1.512(4) . ? 
C5 C6 1.523(3) . ? 
C7 C8 1.470(3) . ? 
C8 C9 1.383(3) . ? 
C9 C10 1.376(3) . ? 
C10 C11 1.365(3) . ? 
C11 C12 1.378(3) . ? 
C13 C14 1.465(2) . ? 
C14 C15 1.389(3) . ? 
C15 C16 1.382(3) . ? 
C16 C17 1.359(3) . ? 
C17 C18 1.378(3) . ? 
C21 C22 1.511(3) . ? 
C22 C23 1.391(3) . ? 
C23 C24 1.392(3) . ? 
C24 C25 1.513(3) . ? 
C31 C32 1.519(3) . ? 
C35 C34 1.514(3) . ? 
C32 C33 1.396(3) . ? 
C34 C33 1.388(3) . ? 
C41 C42 1.508(4) . ? 
C42 C43 1.392(3) . ? 
C43 C44 1.387(3) . ? 
C44 C45 1.527(4) . ? 
C51 C52 1.495(3) . ? 
C52 C53 1.388(3) . ? 
C53 C54 1.394(3) . ? 
C54 C55 1.501(3) . ? 
  
loop_ 
 _geom_angle_atom_site_label_1 
 _geom_angle_atom_site_label_2 
 _geom_angle_atom_site_label_3 
 _geom_angle 
 _geom_angle_site_symmetry_1 
 _geom_angle_site_symmetry_3 
 _geom_angle_publ_flag 
O32 Mn1 O22 101.83(5) . . ? 
O32 Mn1 O31 84.87(5) . . ? 
O22 Mn1 O31 94.10(5) . . ? 
O32 Mn1 O21 95.59(5) . . ? 
O22 Mn1 O21 83.78(5) . . ? 
O31 Mn1 O21 177.88(5) . . ? 
O32 Mn1 N4 87.34(5) . . ? 
O22 Mn1 N4 168.18(5) . . ? 
O31 Mn1 N4 94.14(5) . . ? 
O21 Mn1 N4 87.95(5) . . ? 
O32 Mn1 N2 156.62(5) . . ? 
O22 Mn1 N2 100.53(5) . . ? 
O31 Mn1 N2 86.81(5) . . ? 
O21 Mn1 N2 93.53(5) . . ? 
N4 Mn1 N2 71.51(5) . . ? 
O51 Mn2 O52 83.73(5) . . ? 
O51 Mn2 O42 94.24(5) . . ? 
O52 Mn2 O42 99.34(5) . . ? 
O51 Mn2 O41 95.35(5) . . ? 
O52 Mn2 O41 176.71(6) . . ? 
O42 Mn2 O41 83.87(6) . . ? 
O51 Mn2 N3 96.80(5) . . ? 
O52 Mn2 N3 89.32(5) . . ? 
O42 Mn2 N3 166.66(5) . . ? 
O41 Mn2 N3 87.65(5) . . ? 
O51 Mn2 N1 163.46(5) . . ? 
O52 Mn2 N1 84.24(5) . . ? 
O42 Mn2 N1 98.87(5) . . ? 
O41 Mn2 N1 96.03(5) . . ? 
N3 Mn2 N1 71.75(5) . . ? 
C22 O21 Mn1 129.22(14) . . ? 
C24 O22 Mn1 129.97(14) . . ? 
C32 O31 Mn1 128.47(15) . . ? 
C34 O32 Mn1 128.50(14) . . ? 
C42 O41 Mn2 128.65(14) . . ? 
C44 O42 Mn2 129.40(15) . . ? 
C52 O51 Mn2 130.30(12) . . ? 
C54 O52 Mn2 129.71(13) . . ? 
C7 N1 C1 120.51(17) . . ? 
C7 N1 Mn2 115.02(13) . . ? 
C1 N1 Mn2 124.45(13) . . ? 
C13 N2 C2 118.95(16) . . ? 
C13 N2 Mn1 115.12(13) . . ? 
C2 N2 Mn1 125.92(12) . . ? 
C12 N3 C8 117.41(18) . . ? 
C12 N3 Mn2 126.35(14) . . ? 
C8 N3 Mn2 116.07(12) . . ? 
C18 N4 C14 117.76(17) . . ? 
C18 N4 Mn1 125.94(14) . . ? 
C14 N4 Mn1 116.30(12) . . ? 
N1 C1 C6 107.81(16) . . ? 
N1 C1 C2 107.78(15) . . ? 
C6 C1 C2 113.15(19) . . ? 
N2 C2 C3 109.29(16) . . ? 
N2 C2 C1 107.74(15) . . ? 
C3 C2 C1 113.40(18) . . ? 
C4 C3 C2 111.01(19) . . ? 
C5 C4 C3 110.3(3) . . ? 
C4 C5 C6 110.1(2) . . ? 
C5 C6 C1 111.8(2) . . ? 
N1 C7 C8 121.40(19) . . ? 
N3 C8 C9 122.04(19) . . ? 
N3 C8 C7 115.71(17) . . ? 
C9 C8 C7 122.23(19) . . ? 
C10 C9 C8 119.4(2) . . ? 
C11 C10 C9 118.7(2) . . ? 
C10 C11 C12 119.1(2) . . ? 
N3 C12 C11 123.4(2) . . ? 
N2 C13 C14 121.36(19) . . ? 
N4 C14 C15 122.03(18) . . ? 
N4 C14 C13 115.70(17) . . ? 
C15 C14 C13 122.27(19) . . ? 
C16 C15 C14 119.0(2) . . ? 
C17 C16 C15 119.0(2) . . ? 
C16 C17 C18 119.4(2) . . ? 
N4 C18 C17 122.8(2) . . ? 
O21 C22 C23 125.1(2) . . ? 
O21 C22 C21 116.0(2) . . ? 
C23 C22 C21 118.8(2) . . ? 
C22 C23 C24 126.6(2) . . ? 
O22 C24 C23 125.1(2) . . ? 
O22 C24 C25 115.6(3) . . ? 
C23 C24 C25 119.3(2) . . ? 
O31 C32 C33 125.1(2) . . ? 
O31 C32 C31 115.7(2) . . ? 
C33 C32 C31 119.2(2) . . ? 
O32 C34 C33 125.2(2) . . ? 
O32 C34 C35 115.2(3) . . ? 
C33 C34 C35 119.6(3) . . ? 
C34 C33 C32 126.8(2) . . ? 
O41 C42 C43 125.5(2) . . ? 
O41 C42 C41 116.1(3) . . ? 
C43 C42 C41 118.4(3) . . ? 
C44 C43 C42 126.6(2) . . ? 
O42 C44 C43 125.4(2) . . ? 
O42 C44 C45 115.6(3) . . ? 
C43 C44 C45 119.0(3) . . ? 
O51 C52 C53 124.33(18) . . ? 
O51 C52 C51 116.3(2) . . ? 
C53 C52 C51 119.3(2) . . ? 
C52 C53 C54 126.51(19) . . ? 
O52 C54 C53 124.97(19) . . ? 
O52 C54 C55 116.3(2) . . ? 
C53 C54 C55 118.7(2) . . ? 
  
_diffrn_measured_fraction_theta_max    0.903 
_diffrn_reflns_theta_full              28.90 
_diffrn_measured_fraction_theta_full   0.903 
_refine_diff_density_max    0.232 
_refine_diff_density_min   -0.199 
_refine_diff_density_rms    0.043 
  
